# Supplementary material
Source: publisher figshare collection journal article supplement (https://acs.figshare.com/ndownloader/files/22469246)
Supplement: Supplementary file 1 [file 22469246]

# ***Supporting Information***

## **Cobalt-based Multicomponent Oxygen Reduction Reaction Electrocatalysts Generated by Melamine Thermal Pyrolysis with High Performance in an Alkaline Hydrogen/Oxygen Micro-Fuel Cell**

Haihong Zhong<sup>a,b</sup>, Luis Alberto Estudillo-Wong<sup>c</sup>, Yuan Gao<sup>a</sup>, Yongjun Feng<sup>\*,a,d</sup>, Nicolas Alonso-Vante<sup>\*,b</sup>

<sup>a</sup> *State Key Laboratory of Chemical Resource Engineering, Beijing Engineering Center for Hierarchical Catalysts, College of Chemistry, Beijing University of Chemical Technology, No. 15 Beisanhuan East Road, Beijing, 100029, China*

<sup>b</sup> *IC2MP, UMR-CNRS 7285, University of Poitiers, F-86022 Poitiers Cedex, France*

<sup>c</sup> *Departamento de Sociedad y Política Ambiental, CIEMAD, Instituto Politécnico Nacional, Calle 30 de junio de 1520, Alcaldía GAM, C.P. 07340, CDMX, México.*

<sup>d</sup> *Anqing Research Institute, Beijing University of Chemical Technology, No. 8 Huanhu West Road, High-Tech district, Anqing city, Anhui, 24600, China*

*Corresponding Author*

*\*E-mail addresses: yjfeng@mail.buct.edu.cn (Y.J. Feng); nicolas.alonso.vante@univ-poitiers.fr (N. Alonso-Vante)*

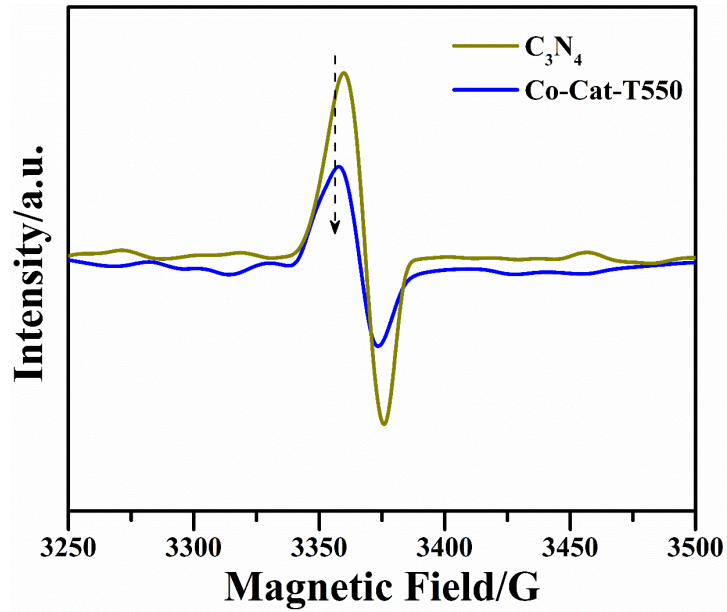

Figure S1. EPR spectra of  $C_3N_4$  and Co-Cat-T550.

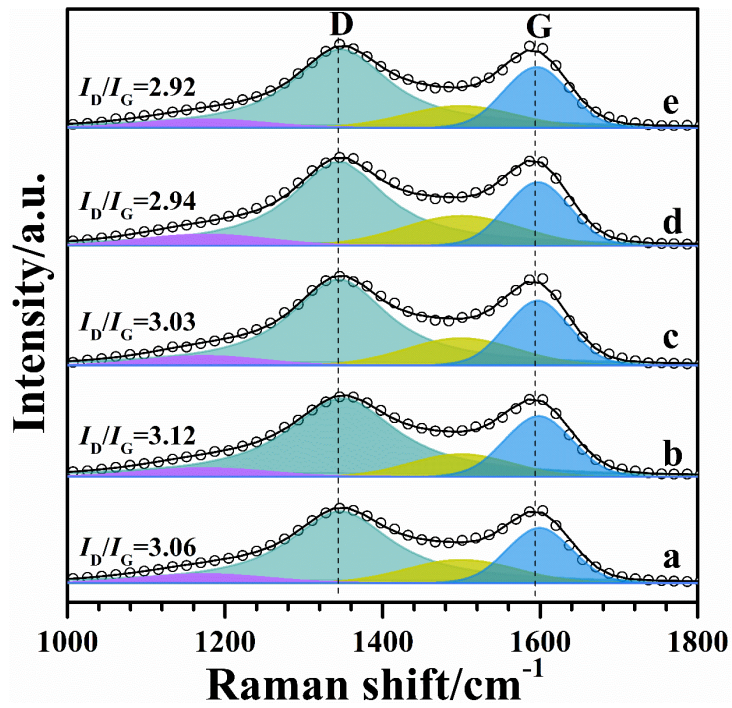

Figure S2. Raman spectra of all cobalt-based samples with labeled as: Co-Cat-T500 (a), T550 (b), T600 (c), T700 (d), T800 (e).

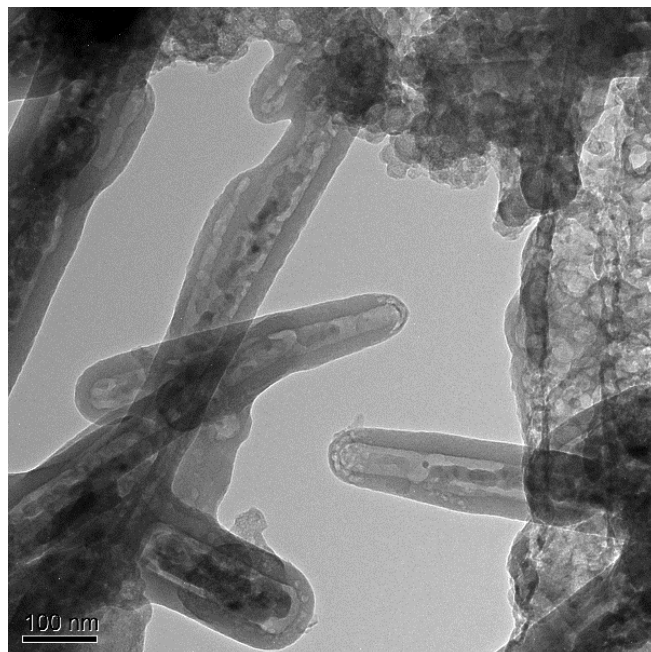

**Figure S3.** TEM image of Co-Cat-T550 sample.

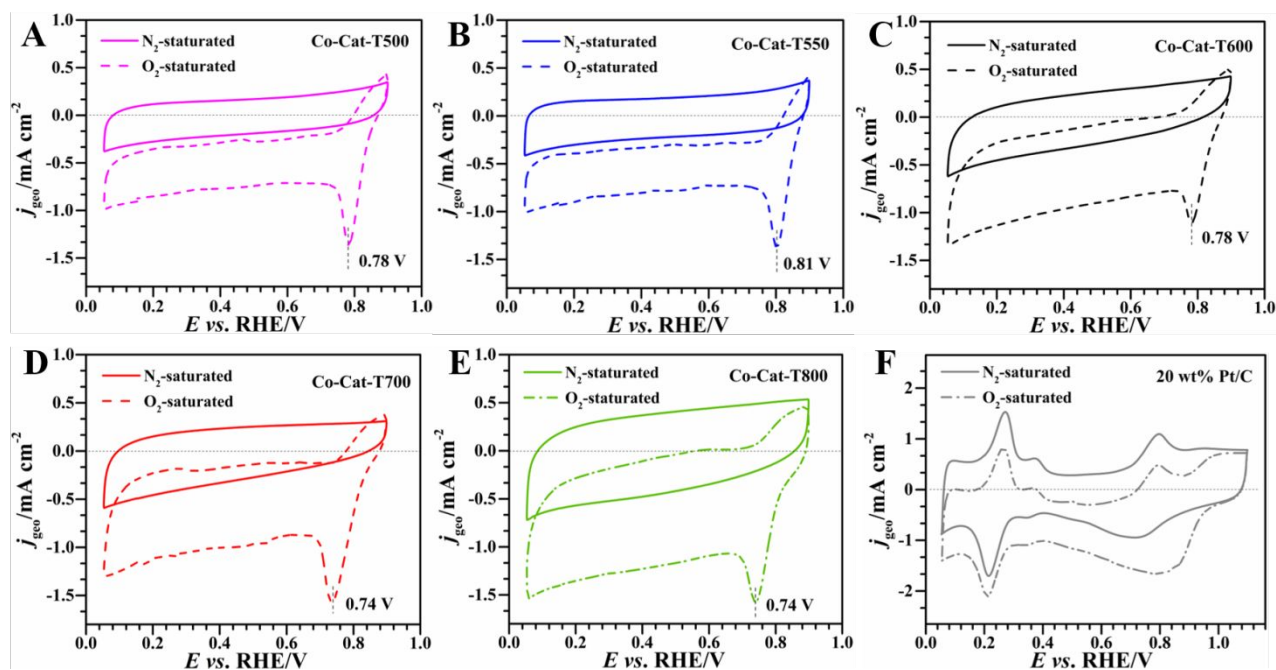

**Figure S4.** (A-F) CV curves (ongoing positive scan) of the Co-Cat-T500, Co-Cat-T550, Co-Cat-T600, Co-Cat-T700, Co-Cat-T800 and 20 wt.% Pt/C catalysts in  $N_2$  (solid line) and  $O_2$ -saturated (dash line) 0.1 M KOH

at a scan rate of  $50 \text{ mV s}^{-1}$ , respectively.

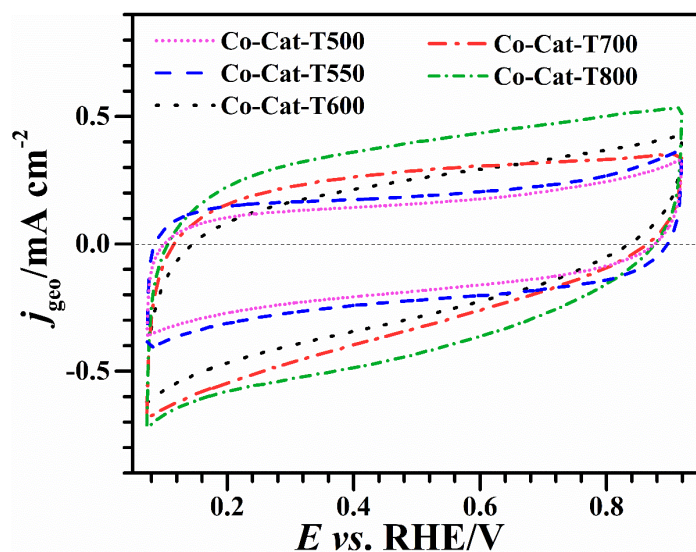

**Figure S5.** CV curves (ongoing positive scan) of the Co-Cat-T500, -T550, -T600, -T700, and -T800 in  $\text{N}_2$ -saturated  $0.1 \text{ M KOH}$  at a scan rate of  $50 \text{ mV s}^{-1}$ , respectively.

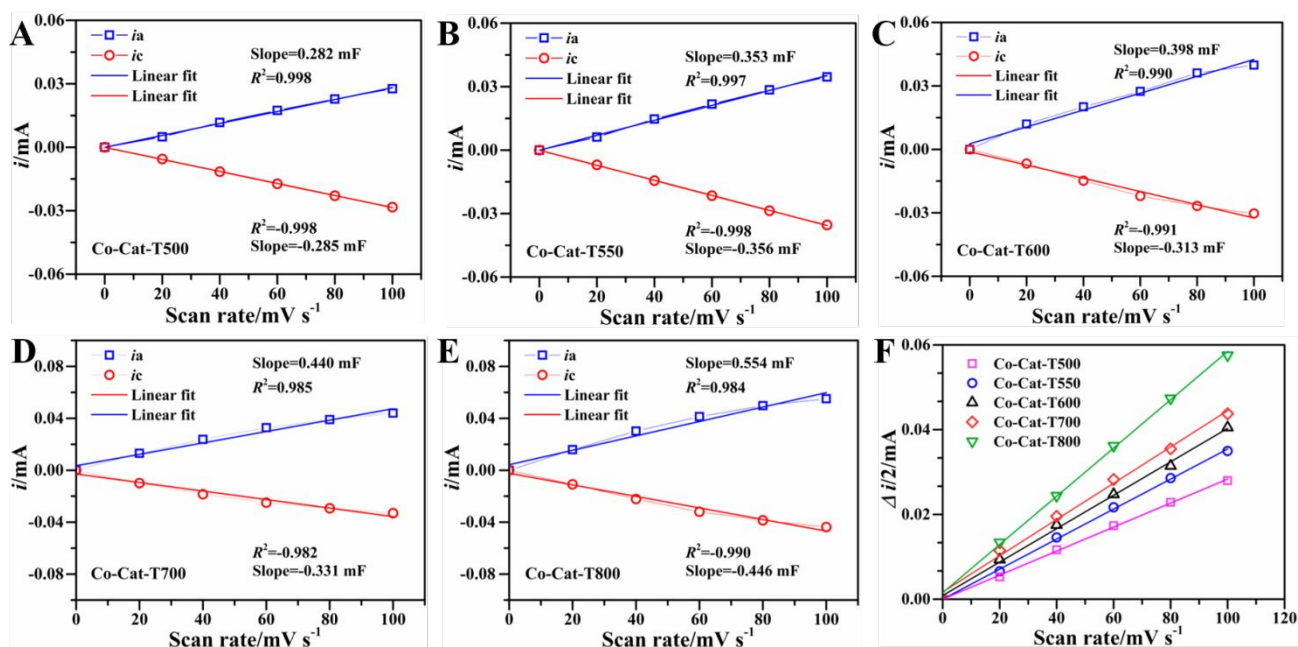

**Figure S6.** (A-E) ECSA measurement for all the samples at different scan rates from  $20$  to  $100 \text{ mV s}^{-1}$  in  $\text{N}_2$ -saturated  $0.1 \text{ M KOH}$  within a non-faradaic region of  $0.30\text{--}0.40 \text{ V vs. RHE}$ ; (F) the capacitive currents of all the samples measured at  $0.35 \text{ V vs. RHE}$  were plotted as a function of scan rates from  $20 \text{ mV s}^{-1}$  to  $100 \text{ mV s}^{-1}$  at RT.



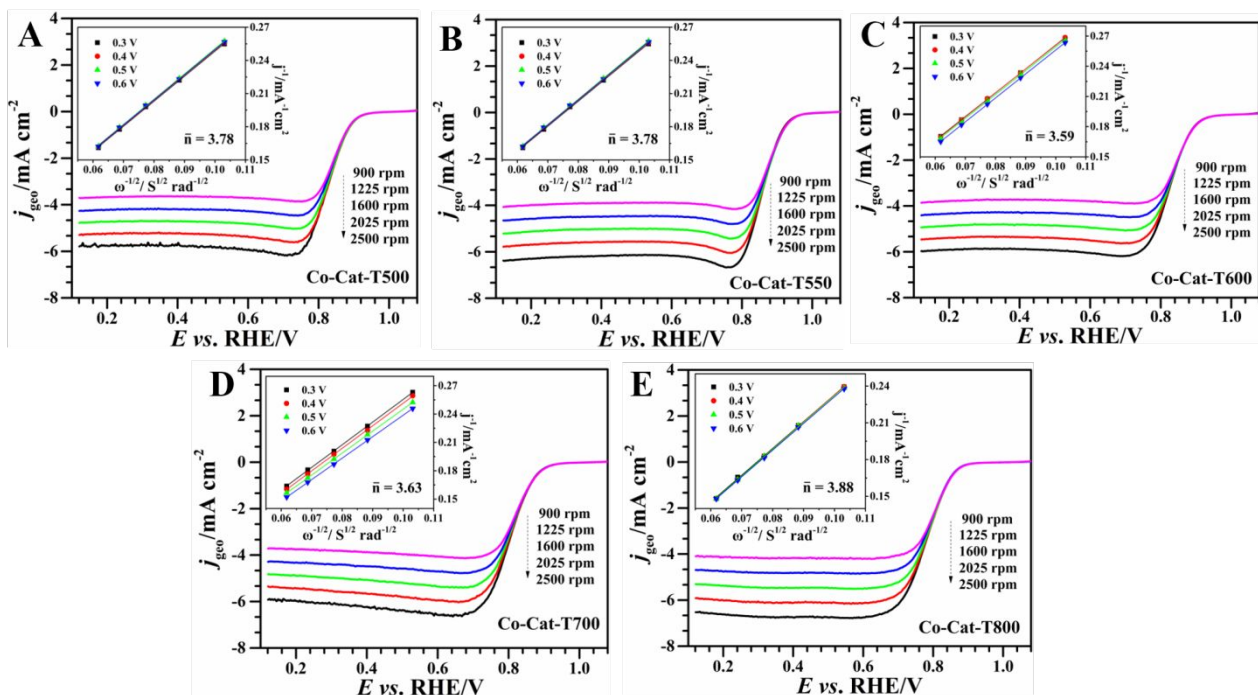

**Figure S7.** LSV curves of the Co-Cat-T500 (A), Co-Cat-T550 (B), Co-Cat-T600 (C), Co-Cat-T700 (D), and Co-Cat-T800 (E) catalysts in  $\text{O}_2$ -saturated 0.1 M KOH at a scan rate of  $5 \text{ mV s}^{-1}$  at different rotation speeds ranged from 2500 to 900 rpm, RT. Inset: the corresponding Koutecky-Levich plots derived from the LSV curves at different potentials.

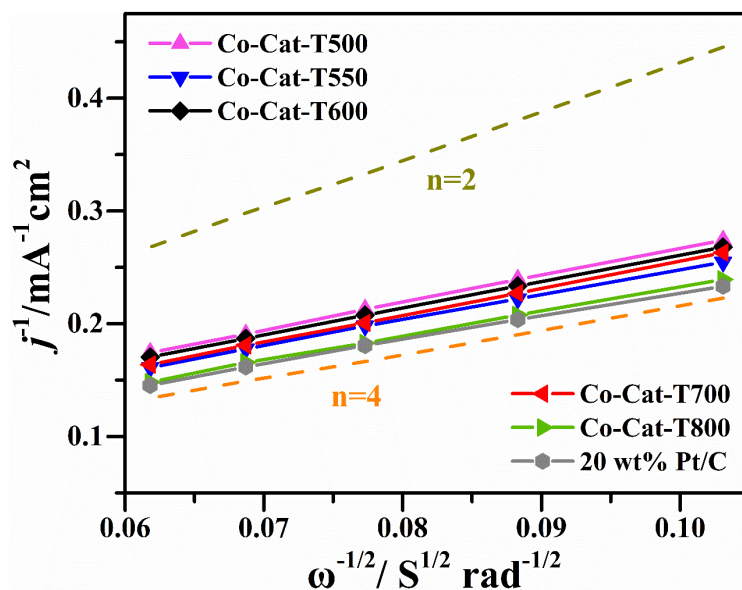

**Figure S8.** The number of electrons transferred,  $n$ , per  $\text{O}_2$  molecule calculated from K-L data.

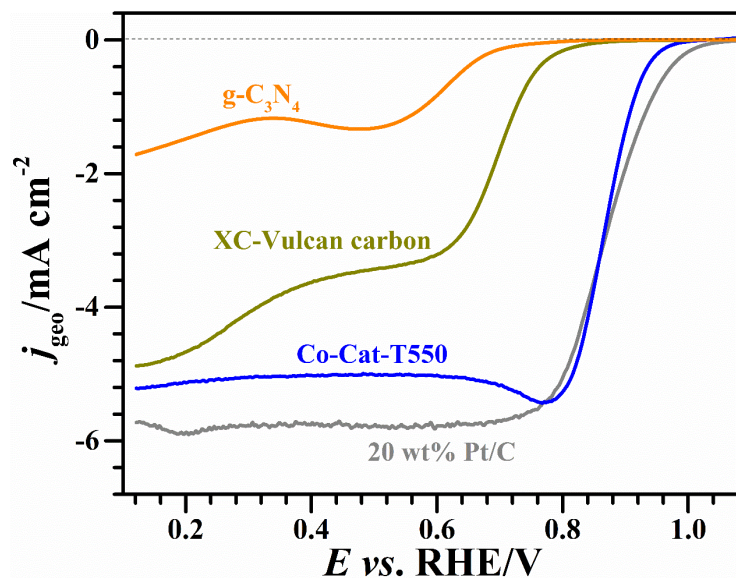

**Figure S9.** LSV curves (negative-going scan) of the pure  $\text{g-C}_3\text{N}_4$ , XC-Vulcan carbon, Co-Cat-T550, and commercial 20 wt.% Pt/C catalysts in  $\text{O}_2$ -saturated 0.1 M KOH at 1600 rpm, RT, at a scan rate of  $5 \text{ mV s}^{-1}$ .

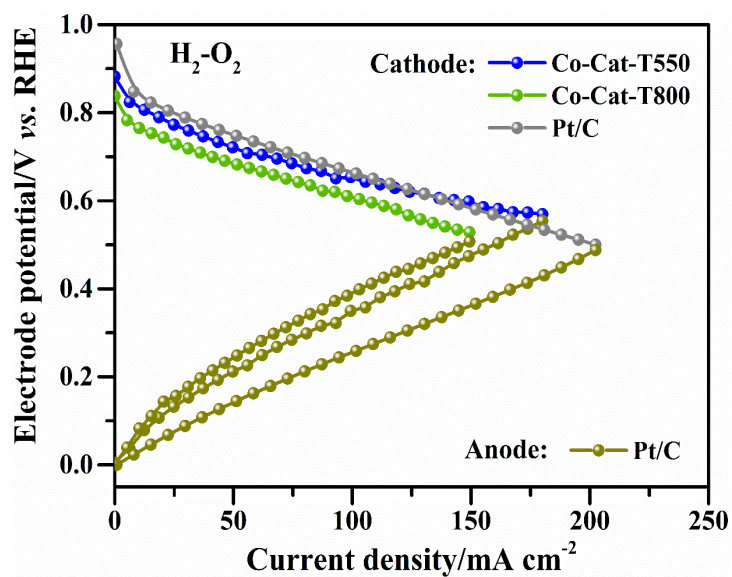

**Figure S10.** Current-potential curves, at RT, of the  $\mu\text{LFFC}$  with Co-Cat-T550, Co-Cat-T800 and Pt/C as cathode electrodes in 3 M KOH. 20 wt.% Pt/C was used as anode.



**Table S1.** XPS spectra analyses of N 1s signal (peak position and atomic percentage) for all heat-treated samples.

| Catalysts          | N                |                        |                  |                  |                           | Ratio of N4/N1 |
|--------------------|------------------|------------------------|------------------|------------------|---------------------------|----------------|
|                    | pyridinic-N (N1) | Co-N <sub>x</sub> (N2) | pyrrolic-N (N3)  | graphitic-N (N4) | oxidized graphitic-N (N5) |                |
| <b>Co-Cat-T500</b> | 398.3<br>(65.7%) | 399.5<br>(16.7%)       | 400.3<br>(11.9%) | --               | (5.7%)                    | -              |
| <b>Co-Cat-T550</b> | 398.1<br>(65.8%) | 399.3<br>(18.8%)       | 400.4<br>(11.3%) | -                | (4.1%)                    | -              |
| <b>Co-Cat-T600</b> | 398.2<br>(47.7%) | 399.1<br>(12.6%)       | 400.1<br>(2.7%)  | 401.0<br>(15.8%) | 404.7<br>(21.2%)          | 0.33           |
| <b>Co-Cat-T700</b> | 398.1<br>(33.4%) | 399.1<br>(13.7%)       | 400.2<br>(12.2%) | 401.1<br>(21.9%) | 404.9<br>(18.8%)          | 0.65           |
| <b>Co-Cat-T800</b> | 398.1<br>(29.1%) | 399.1<br>(13.5%)       | 400.2<br>(11.2%) | 401.4<br>(22.8%) | 404.5<br>(23.4%)          | 0.78           |

**Table S2.** The onset potential ( $E_{\text{onset}}$ ), cathodic potential of ORR peak ( $E_{\text{p,c}}$  vs. RHE), half-wave potential ( $E_{1/2}$  V vs. RHE), kinetic current density at 0.8 V ( $j_{\text{k,geo@0.8V}}$ /mA cm<sup>-2</sup>), and Tafel slope (|b|/mV dec<sup>-1</sup>) of all samples.

| Catalysts           | $E_{\text{onset}}$ /V<br>vs. RHE | $E_{\text{p,c}}$ /V<br>vs. RHE | $E_{1/2}$ /V<br>vs. RHE | $j_{\text{k,geo@0.8V}}$<br>/mA cm <sup>-2</sup> | Tafel slope  b <br>/mV dec <sup>-1</sup> |
|---------------------|----------------------------------|--------------------------------|-------------------------|-------------------------------------------------|------------------------------------------|
| <b>Co-Cat-T500</b>  | 0.93                             | 0.78                           | 0.83                    | 3.33                                            | 60                                       |
| <b>Co-Cat-T550</b>  | 0.96                             | 0.81                           | 0.86                    | 11.24                                           | 52                                       |
| <b>Co-Cat-T600</b>  | 0.94                             | 0.78                           | 0.83                    | 3.21                                            | 64                                       |
| <b>Co-Cat-T700</b>  | 0.92                             | 0.74                           | 0.81                    | 1.73                                            | 67                                       |
| <b>Co-Cat-T800</b>  | 0.90                             | 0.74                           | 0.78                    | 0.83                                            | 62                                       |
| <b>20 wt.% Pt/C</b> | 1.01                             | 0.80                           | 0.86                    | 10.58                                           | 66                                       |



**Table S3. Comparison of ORR activities of Co-Cat-T (this work) with those reported for Co-based and commercial Pt/C catalysts in 0.1 M KOH solution.**

| Catalysts                                                                    | $E_{\text{onset}}/\text{V}$<br>vs. RHE | $E_{1/2}/\text{V}$ vs.<br>RHE | Tafel slope/<br>$\text{mV dec}^{-1}$ | $E_{\text{p, c}}/\text{V}$<br>vs. RHE | Ref.      |
|------------------------------------------------------------------------------|----------------------------------------|-------------------------------|--------------------------------------|---------------------------------------|-----------|
| Co-Cat-T550                                                                  | 0.96                                   | 0.86                          | 52                                   | 0.81                                  | This work |
| 20% Pt/C                                                                     | 1.01                                   | 0.86                          | 66                                   | 0.80                                  | This work |
| NGT-Co <sub>35</sub> V <sub>65</sub> -45-900<br>(-0.05 mA cm <sup>-2</sup> ) | 0.92                                   | 0.81                          | 66                                   | ~0.79                                 | 1         |
| Co <sub>x</sub> N/NHCS                                                       | -0.02 vs. SCE                          | -0.12 vs.<br>SCE              | 89                                   | -0.02 vs.<br>SCE                      | 2         |
| Co/NC                                                                        | 0.98                                   | 0.87 V                        | 102                                  | 0.83                                  | 3         |
| Co-N/Co-O@N-C                                                                | 0.93                                   | N/A                           | 51                                   | N/A                                   | 4         |
| Co-N-C/CoO <sub>x</sub> -3                                                   | N/A                                    | 0.82                          | N/A                                  | 0.84                                  | 5         |
| Co/NC                                                                        | ~0.90                                  | 0.83                          | N/A                                  | N/A                                   | 6         |
| Co-N@HCS                                                                     | 0.96                                   | 0.86                          | 56                                   | N/A                                   | 7         |
| Co-N <sub>x</sub> /C NRA                                                     | ~0.97                                  | 0.88                          | 66                                   | 0.87                                  | 8         |
| CoCOF-Py-0.05rGO                                                             | 0.84                                   | 0.77                          | N/A                                  | 0.75                                  | 9         |
| CoN <sub>x</sub> /NGA                                                        | 0.93                                   | 0.83                          | 66                                   | 0.78                                  | 10        |
| Co-N-OMMC-0.6                                                                | N/A                                    | 0.83                          | N/A                                  | 0.78                                  | 11        |
| CoO/N-rMdGO                                                                  | 0.89                                   | 0.82                          | 57                                   | N/A                                   | 12        |
| CoO/rGO(N)                                                                   | 0.95                                   | 0.83                          | 58                                   | N/A                                   | 13        |

## References:

1. Wang, Y.; Wang, L.; Tong, M.; Zhao, X.; Gao, Y.; Fu, H. Co-VN Encapsulated in Bamboo-like N-doped Carbon Nanotubes for Ultrahigh-stability of Oxygen Reduction Reaction. *Nanoscale* **2018**, *10* (9), 4311-4319.
2. Zhong, X.; Liu, L.; Jiang, Y.; Wang, X.; Wang, L.; Zhuang, G.; Li, X.; Mei, D.; Wang, J.-g.; Su, D. S. Synergistic Effect of Nitrogen in Cobalt Nitride and Nitrogen-doped Hollow Carbon Spheres for the Oxygen Reduction Reaction. *ChemCatChem* **2015**, *7* (12), 1826-1832.
3. Guan, B. Y.; Yu, L.; Lou, X. W. D. Formation of Single-holed Cobalt/N-doped Carbon Hollow Particles with Enhanced Electrocatalytic Activity toward Oxygen Reduction Reaction in Alkaline Media. *Adv. Sci.* **2017**, *4* (10), 1700247-1700252.
4. Lee, K. J.; Shin, D. Y.; Byeon, A.; Lim, A.; Jo, Y. S.; Begley, A.; Lim, D. H.; Sung, Y. E.; Park, H. S.; Chae,

- K. H.; Nam, S. W.; Lee, K. Y.; Kim, J. Y. Hierarchical Cobalt-nitride and -Oxide co-doped Porous Carbon Nanostructures for Highly Efficient and Durable Bifunctional Oxygen Reaction Electrocatalysts. *Nanoscale* **2017**, 9 (41), 15846-15855.
5. Xin, W.-L.; Lu, K.-K.; Shan, D. In Situ Doped  $\text{CoCO}_3/\text{ZIF-67}$  Derived Co-N-C/ $\text{CoO}_x$  Catalysts for Oxygen Reduction Reaction. *Appl. Surf. Sci.* **2019**, 481, 313-318.
  6. Aijaz, A.; Masa, J.; Rosler, C.; Xia, W.; Weide, P.; Botz, A. J.; Fischer, R. A.; Schuhmann, W.; Muhler, M.  $\text{Co@Co}_3\text{O}_4$  Encapsulated in Carbon Nanotube-grafted Nitrogen-doped Carbon Polyhedra as An Advanced Bifunctional Oxygen Electrode. *Angew. Chem. Int. Ed. Engl.* **2016**, 55 (12), 4087-4091.
  7. Cai, S.; Meng, Z.; Tang, H.; Wang, Y.; Tsiakaras, P. 3D Co-N-doped Hollow Carbon Spheres as Excellent Bifunctional Electrocatalysts for Oxygen Reduction Reaction and Oxygen Evolution Reaction. *Appl. Catal. B: Environ.* **2017**, 217, 477-484.
  8. Amiin, I. S.; Liu, X.; Pu, Z.; Li, W.; Li, Q.; Zhang, J.; Tang, H.; Zhang, H.; Mu, S. From 3D ZIF Nanocrystals to Co-N<sub>x</sub>/C Nanorod Array Electrocatalysts for ORR, OER, and Zn-Air Batteries. *Adv. Funct. Mater.* **2018**, 28 (5), 1704638-1704646.
  9. Zuo, Q.; Cheng, G.; Luo, W. A Reduced Graphene Oxide/covalent Cobalt Porphyrin Framework for Efficient Oxygen Reduction Reaction. *Dalton. Trans.* **2017**, 46 (29), 9344-9348.
  10. Zou, H.; Li, G.; Duan, L.; Kou, Z.; Wang, J. In Situ Coupled Amorphous Cobalt Nitride with Nitrogen-doped Graphene Aerogel as A Trifunctional Electrocatalyst towards Zn-air Battery driven Full Water Splitting. *Appl. Catal. B: Environ.* **2019**, 259, 118100-118110.
  11. Sun, T.; Xu, L.; Li, S.; Chai, W.; Huang, Y.; Yan, Y.; Chen, J. Cobalt-nitrogen-doped Ordered Macro-/mesoporous Carbon for Highly Efficient Oxygen Reduction Reaction. *Appl. Catal. B: Environ.* **2016**, 193, 1-8.
  12. Mao, S. W.; Z.; Huang, T.; Hou, Y.; Chen, J. High-performance Bi-functional Electrocatalysts of 3D Crumpled Graphene-cobalt Oxide Nanohybrids for Oxygen Reduction and Evolution Reactions. *Energy Environ. Sci.* **2014**, 7, 609-609.
  13. He, Q.; Li, Q.; Khene, S.; Ren, X.; López-Suárez, F. E.; Lozano-Castelló, D.; Bueno-López, A.; Wu, G. High-loading Cobalt Oxide Coupled with Nitrogen-doped Graphene for Oxygen Reduction in Anion-exchange-membrane Alkaline Fuel Cells. *J. Phys. Chem. C* **2013**, 117 (17), 8697-8707.
